# Supplementary material for: Joint Contributions of Rare Copy Number Variants and Common SNPs to Risk for Schizophrenia
Source: Atypon-hosted journal article supplement (doi:10.1176/appi.ajp.2018.17040467), 2018-11-05

SUPPLEMENTAL MATERIAL

for

Joint contributions of rare CNVs and common SNPs to risk for schizophrenia

Bergen et al. 2018

**Supplementary Table S1.** Information on contributing studies, including country of origin, study PI, presence of family trios in the study, CNV- and GWAS genotyping arrays used as well as the numbers of subjects passing CNV quality control (QC).

| Collection country | Data ID | PI                | Trio_fam | CNV genotyping array | GWAS genotyping array | QC final dataset size | QC final CNV cases | QC final CNV controls |
|--------------------|---------|-------------------|----------|----------------------|-----------------------|-----------------------|--------------------|-----------------------|
| Scotland           | aber    | St Clair          | no       | A5.0                 | A6.0                  | 1375                  | 690                | 685                   |
| Portugal           | port    | Pato              | no       | A5.0                 | A6.0                  | 472                   | 281                | 191                   |
| Sweden             | swel    | Sullivan          | no       | A5.0                 | A5.0                  | 265                   | 140                | 125                   |
| UK                 | uclo    | McQuillan         | no       | A5.0                 | A6.0                  | 461                   | 461                | 0                     |
| USA                | cati    | Sullivan          | no       | A500                 | A500                  | 515                   | 314                | 201                   |
| 7 countries        | pewb    | Bramon            | no       | A6.0                 | 11M                   | 1630                  | 365                | 1265                  |
| Spain              | pews    | Bramon            | no       | A6.0                 | 11M                   | 60                    | 42                 | 18                    |
| USA                | mgs2    | Gejrnan           | no       | A6.0                 | A6.0                  | 4913                  | 2537               | 2376                  |
| Bulgaria           | buls    | Kirov             | no       | A6.0                 | A6.0                  | 767                   | 182                | 585                   |
| Ireland            | dubl    | Corvin            | no       | A6.0                 | A6.0                  | 1058                  | 252                | 806                   |
| Scotland           | edin    | Blackwood         | no       | A6.0                 | A6.0                  | 617                   | 341                | 276                   |
| Sweden             | s234    | Sullivan          | no       | A6.0                 | A6.0                  | 3223                  | 1314               | 1909                  |
| Norway             | top8    | Andreassen        | no       | A6.0                 | A6.0                  | 431                   | 166                | 265                   |
| Ireland            | irwt    | Corvin            | no       | A6.0                 | A6.0                  | 1886                  | 1089               | 797                   |
| Bulgaria           | butr    | Kirov             | yes      | A6.0                 | A6.0                  | 293                   | 293                | 0                     |
| Canada/USA         | lktu    | Knight            | no       | A6.0                 | A6.0                  | 172                   | 172                | 0                     |
| USA                | msaf    | Buxbaum           | no       | A6.0                 | A6.0                  | 399                   | 274                | 125                   |
| Germany            | munc    | Rujescu           | no       | 1300                 | 1317                  | 695                   | 410                | 285                   |
| Germany            | boco    | Rietschel/Rujescu | no       | 1550                 | 1550                  | 1711                  | 458                | 1253                  |
| USA                | ucia    | Ophoff            | no       | 1550                 | 1550                  | 1124                  | 672                | 452                   |
| Australia          | asrb    | Mowry             | no       | 1610                 | 1650                  | 611                   | 367                | 244                   |
| Denmark            | denm    | Werge             | no       | 1610                 | 1650                  | 830                   | 451                | 379                   |
| USA                | clms    | Buxbaum           | no       | omni_express         | ill                   | 89                    | 35                 | 54                    |
| UK                 | cl03    | O'Donovan         | no       | omni_express         | omni                  | 3165                  | 2096               | 1069                  |
| Estonia            | egcu    | Esko              | no       | omni_express         | omni                  | 1347                  | 229                | 1118                  |
| Sweden             | swes5   | Sullivan          | no       | omni_express         | omni                  | 4238                  | 1729               | 2509                  |
| Sweden             | swes6   | Sullivan          | no       | omni_express         | omni                  | 2077                  | 952                | 1125                  |
| UK                 | uktr    | Kirov             | yes      | omni_express         | omni                  | 39                    | 39                 | 0                     |
| Sweden             | umeb    | Adolfsson         | no       | omni_express         | omni                  | 850                   | 325                | 525                   |
| Sweden             | umes    | Adolfsson         | no       | omni_express         | omni                  | 848                   | 186                | 662                   |
| UK                 | clm2    | O'Donovan         | no       | omni_express_plus    | 11M                   | 3418                  | 3418               | 0                     |
| UK                 | cou3    | Walters           | no       | omni_express_plus    | omni                  | 1127                  | 526                | 601                   |
| Sweden             | ersw    | Jonsson           | no       | omni_express_plus    | omni                  | 577                   | 260                | 317                   |
| USA                | clms    | Petryshen         | no       | omni_2_5             | ill                   | 38                    | 28                 | 10                    |

**Supplementary Table S2.** Previously associated CNVs and reported effect sizes from: Rees E, Walters JT, Georgieva L, Isles AR, Chambert KD, Richards AL, et al. Analysis of copy number variations at 15 schizophrenia-associated loci. *Br J Psychiatry.* 2014;204(2):108-14. Number of carriers by affection status and study odds ratio are for the current material.

| CNV Type     | Implicated Locus | Lit. OR <sup>1</sup> | Cases | Controls | Study OR <sup>2</sup> |
|--------------|------------------|----------------------|-------|----------|-----------------------|
| Deletions    | 22q11.2          | 28.3                 | 56    | 0        | ∞                     |
|              | 15q11.2          | 2.2                  | 97    | 50       | 1.9                   |
|              | 1q21.1           | 8.4                  | 30    | 6        | 4.8                   |
|              | 3q29             | 57.7                 | 14    | 0        | ∞                     |
|              | 15q13.3          | 7.5                  | 23    | 2        | 11.0                  |
|              | NRXN1 chr2       | 9.0                  | 36    | 3        | 11.5                  |
| Duplications | 16p11.2          | 11.5                 | 53    | 4        | 12.7                  |
|              | 7q11.23          | 11.4                 | 10    | 0        | ∞                     |
|              | 1q21.1           | 3.5                  | 20    | 4        | 4.8                   |
|              | 16p13.11         | 2.3                  | 57    | 46       | 1.2                   |
|              | 15q11.2-15q13.1  | 13.2                 | 11    | 0        | ∞                     |

<sup>1</sup> Lit. OR = odds ratio as reported in the literature

<sup>2</sup> Study OR = crude odds ratio estimated from our material

**Supplementary Table S3.** Average PRS for carriers and non-carriers, separately for cases and controls, by individual CNV. Ref = reference

| Status          | CNV          | N     | Mean          | Difference    | P-Value        |
|-----------------|--------------|-------|---------------|---------------|----------------|
| <b>Cases</b>    | Non-carrier  | 20681 | 0.97 (0.017)  | ref           | ref            |
| OR <5           | 15q11.2_del  | 97    | 1.20 (0.222)  | 0.22 (0.250)  | 0.370          |
|                 | 16p13.11_dup | 57    | 0.74 (0.308)  | -0.23 (0.326) | 0.480          |
|                 | 1q21.1_dup   | 20    | 0.90 (0.529)  | -0.07 (0.551) | 0.900          |
| 5 <= OR < 15    | 15q13.3_del  | 23    | 1.37 (0.450)  | 0.40 (0.514)  | 0.440          |
|                 | 1q21.1_del   | 30    | 0.45 (0.410)  | -0.52 (0.450) | 0.250          |
|                 | NRXN1        | 36    | 0.78 (0.371)  | -0.19 (0.411) | 0.640          |
|                 | 7q11.23_dup  | 10    | 2.17 (0.826)  | 1.20 (0.779)  | 0.120          |
|                 | 16p11.2_dup  | 53    | 0.76 (0.352)  | -0.22 (0.339) | 0.520          |
|                 | 15q11.2_dup  | 11    | 0.80 (0.831)  | -0.17 (0.742) | 0.820          |
| 15 < OR         | 22q11_del    | 56    | -0.59 (0.350) | -1.56 (0.329) | <b>2.2e-06</b> |
|                 | 3q29_del     | 14    | -0.15 (0.649) | -1.12 (0.658) | 0.089          |
| <b>Controls</b> | Non-carrier  | 20107 | -1.01 (0.017) | ref           | ref            |
| OR <5           | 15q11.2_del  | 50    | -0.90 (0.267) | 0.11 (0.341)  | 0.74           |
|                 | 16p13.11_dup | 46    | -1.38 (0.379) | -0.37 (0.356) | 0.30           |
|                 | 1q21.1_dup   | 4     | -1.81 (1.562) | -0.80 (1.207) | 0.51           |
| 5 <= OR < 15    | 15q13.3_del  | 2     | 0.88 (0.945)  | 1.89 (1.706)  | 0.27           |
|                 | 1q21.1_del   | 6     | 0.43 (0.256)  | 1.44 (0.985)  | 0.14           |
|                 | NRXN1        | 3     | -1.20 (0.795) | -0.19 (1.393) | 0.89           |
|                 | 7q11.23_dup  | 0     | -             | -             | -              |
|                 | 16p11.2_dup  | 4     | 0.91 (1.393)  | 1.92 (1.207)  | 0.11           |
|                 | 15q11.2_dup  | 0     | -             | -             | -              |
| 15 < OR         | 22q11_del    | 0     | -             | -             | -              |
|                 | 3q29_del     | 0     | -             | -             | -              |

**Supplementary Table S4a.** Logistic liability models for schizophrenia as a function of PRS and CNV status in non-carriers of specific CNVs (n = 40,732). *Large deletions* codes the presences of deletions  $\geq 500\text{kb}$  as a binary 0/1 variable, and *Total CNV burden* includes the sum of measured CNVs (in kb) as a continuous linear predictor. “+” indicates an additive main effect, “x” a full interaction model with both main effects and an interaction term.

All models are adjusted for collection site, sex, population substructure and CNV-metric. P-values are based on a likelihood-ratio test of the null hypothesis that the model of interest does not perform better than the reference model.

| Model | Genetic Exposure                        | df | AIC    | R <sup>2</sup> | Ref Model | Delta AIC | Delta R <sup>2</sup> | p-value  |
|-------|-----------------------------------------|----|--------|----------------|-----------|-----------|----------------------|----------|
| 0     | None                                    | 40 | 5787.0 | 30.94          | -         | -         | -                    | -        |
| 1     | PRS only                                | 41 | 1072.0 | 42.13          | 0         | 4715.0    | 11.19                | 1E-99    |
| 2     | Large delonly<br>Total CNV burden       | 41 | 5778.2 | 30.96          | 0         | 8.8       | 0.02                 | 0.00098  |
| 3     | only                                    | 41 | 5772.6 | 30.98          | 0         | 14.4      | 0.04                 | 0.000051 |
| 4     | PRS + large deletion<br>PRS + total CNV | 42 | 1062.9 | 42.16          | 1         | 9.1       | 0.03                 | 0.00089  |
| 5     | burden                                  | 42 | 1057.7 | 42.17          | 1         | 14.3      | 0.04                 | 0.000056 |
| 6     | PRS x large deletion<br>PRS x total CNV | 43 | 1064.9 | 42.16          | 4         | -2.0      | 0.00                 | 0.91     |
| 7     | burden                                  | 43 | 1058.2 | 42.17          | 5         | -0.5      | 0.00                 | 0.21     |

**Supplementary Table S4b.** Logistic liability models for schizophrenia as a function of GRS and CNV status in carriers of specific CNVs (n = 522). *Specific CNV-OR* includes the previously reported log(OR) for the specific CNV as predictor. *Large deletions* codes the presences of deletions  $\geq 500\text{kb}$  as a binary 0/1 variable, and *Total CNV burden* includes the sum of measured CNVs (in kb) as a continuous linear predictor. “+” indicates an additive main effect, “x” a full interaction model with both main effects and an interaction term.

All models are adjusted for collection site, sex, population substructure and CNV-metric. P-values are based on a likelihood-ratio test of the null hypothesis that the model of interest does not perform better than the reference model.

| Model | Genetic Exposure         | df | AIC   | R <sup>2</sup> | Ref Model | Delta AIC | Delta R <sup>2</sup> | p-value |
|-------|--------------------------|----|-------|----------------|-----------|-----------|----------------------|---------|
| 0     | None                     | 37 | 146.0 | 33.5           | -         | -         | -                    | -       |
| 1     | PRS only                 | 38 | 117.6 | 40.3           | 0         | 28.4      | 6.8                  | 3.5E-08 |
| 2     | CNV-OR only              | 38 | 65.8  | 51.0           | 0         | 80.2      | 17.5                 | 1.2E-19 |
| 3     | Large del only           | 38 | 141.4 | 35.0           | 0         | 4.6       | 1.5                  | 0.01    |
| 4     | Total CNV burden only    | 38 | 147.8 | 33.5           | 0         | -1.8      | 0.1                  | 0.63    |
| 5     | PRS + CNV-OR             | 39 | 34.1  | 57.4           | 1         | 83.5      | 17.1                 | 2.3E-20 |
| 6     | PRS + Large del          | 39 | 110.6 | 42.2           | 1         | 7.0       | 1.9                  | 0.0027  |
| 7     | PRS x CNV-OR             | 40 | 28.3  | 58.8           | 5         | 5.8       | 1.4                  | 0.0052  |
| 8     | PRS x Large del          | 40 | 91.8  | 46.6           | 6         | 18.8      | 4.3                  | 5.1E-06 |
| 9     | PRS x CNV-OR + large del | 41 | 30.2  | 58.8           | 7         | -1.9      | 0.0                  | 0.77    |

## Supplementary Methods

**Polygenic risk scores** Polygenic risk scores (PRS) were calculated for the same p-value thresholds as previously used<sup>1</sup>. In a multi-variable logistic regression model for disease status, adjusted for site, sex, CNV quality and five ancestral components, the strength of the association between the different PRS and case-control status in our material was comparable to what has been reported previously<sup>1</sup> (Extended data figures 5, 6a), see Supplementary Table 6 and Supplementary Figure 1A.

**Definition of PRS1** Given that the PRS at different p-value thresholds are by construction correlated, we attempted to concentrate the information contained in the ten original scores S1-S10 by considering a suitable subset of the ten principal components as weighted indices for polygenic risk. We found that the first principal component of the PRS explained indeed 65% of the overall variability across the ten underlying scores S1-S10, and contributed 11.1% to the  $R^2$  of the multivariable model, which is more than any of the original scores (maximum  $R^2$  10.2% for S6/S7, Supplementary Table 6). However, eight out of the nine remaining principal components were still highly significantly associated with schizophrenia in a multivariable model (range of p-values: 4E-5 to 3E-273), offering little opportunity for conceptual simplification.

We found however that normalization of the PRS across sites, as discussed below, and subsequent principal component analysis of the normalized scores was extremely effective in concentrating polygenic risk information: the first principal component of the normalized scores, referred to as PRS1, explains 69% of the variability across the normalized scores and contributes 11.2% to the  $R^2$  of the multivariable model. All other principal components have an  $R^2$  of less than 0.05% and are not statistically significantly associated with schizophrenia, with the exception of component PRS8 with p-value  $p=0.04$  (Supplementary Table 7 and Supplementary Figure 1B-D). Consequently, we used PRS1 throughout as summary measure of polygenic risk for schizophrenia in the analyses presented in the paper.

**Normalization of the original PRS** During initial quality control, we had previously found extensive variability in PRS levels between sites, with between-site differences accounting for between 16% and 66% of total PRS variability across different p-value thresholds (Supplementary Figure 2A). For e.g. score S6, which exhibits intermediate between-site variability, this already translates into dramatic shifts in distribution between sites which is difficult to explain in terms of differential disease risk (Supplementary Figure 2B).

Visual inspection shows that almost all of the between-site variability is shared between cases and controls: for all thresholds, the average PRS among cases follows the average PRS among controls extremely closely (Supplementary Figure 3). We can model this relationship by fitting a linear regression for the mean PRS among cases ( $\overline{PRS}_{\text{Cases}}$ ) as a function of the mean PRS among controls ( $\overline{PRS}_{\text{Controls}}$ ) as

$$\overline{\text{PRS}}_{\text{Cases}} = \beta_0 + \beta_1 \overline{\text{PRS}}_{\text{Controls}} \quad (\text{SuppEq. 1})$$

for all 28 sites that contribute both cases and controls; these are the regression lines shown in Supplementary Figure 3. The corresponding  $R^2$  for these ten models varies from 92% to 99% (median: 98%), suggesting that more than 90% of the between-site variability is indeed shared between cases and controls.

Furthermore, the corresponding estimates  $\hat{\beta}_1$  for the slopes of these models are all close to 1 (range: 0.90-1.05, median: 1.00), and their 95% confidence intervals all cover 1. We can therefore simplify the model by fixing the slope  $\beta_1$  at 1 without loss of generality:

$$\overline{\text{GRS}}_{\text{Cases}} = \beta_0 + \overline{\text{GRS}}_{\text{Controls}} \quad (\text{SuppEq. 2})$$

This means that for our collection of sites with both cases and controls, the average PRS among cases and controls differs by a fixed constant; in other words, the excess polygenic risk among cases compared to controls is (on average) constant across sites. We can therefore eliminate more than 90% of the between-site variability simply by subtracting from all PRS values measured at one site the mean PRS among controls at that site: in other words, we align the site distributions of PSR so that all controls are centered at zero.

For sites that only contributed cases ( $n = 5$ ), this does not work, as we cannot estimate the mean PRS among cases. Instead, we use the estimated intercept  $\hat{\beta}_0$  to align the case means directly.

We re-scaled all PRS normalized in this manner to have the same mean and standard deviation as the original scores S1-S10, which produced the normalized scores nS1-nS10 used in the principal component analysis above. As expected, these normalized scores show considerably less variability between sites (Supplementary Figure 1C).

Crucially, this normalization procedure does not affect the association between PRS and schizophrenia: when comparing the normalized scores nS1-nS10 in Supplementary Table 8 with the original scores S1-S10 in Supplementary Table 6, we find that the unscaled odds ratios and their p-value as well as the  $R^2$  contributions are identical. This is due to the fact that the multivariable logistic regression model underlying these estimates is by necessity adjusted for site to allow for site-specific baseline risks of schizophrenia; replacing an original PRS in the multivariable model with its normalized version, which only differs by a term that is constant within site, is equivalent to re-parametrizing the site-specific effect. Neither the overall model fit nor the regression parameter for the PRS is affected by such a re-parametrization. The normalization does not affect statistical inference for individual scores at different p-value thresholds, but has the beneficial effect of aligning the correlation structure between scores in such a way that almost all of the polygenic risk is concentrated in the first principal component PRS1, as demonstrated above.



**Modelling strategy.** We fit separate models for carriers and non-carriers of specific CNVs in order to quantify and test the predictive power of different model terms involving PRS1 and CNV status by comparing models with and without the terms of interest. We contrasted a series of nested models:

- a. a baseline model, including neither PRS1 nor CNV status, but all covariates;
- b. individual effect models, including either PRS1 or CNV to these, in order to quantify the separate effects of these predictors;
- c. additive models, including PRS1 and CNV status, to quantify improvement in predictive power by adding CNV to a PRS1 model;
- d. non-additive effect models adding a PRS1 x CNV interaction term to the additive models to test for non-linear interactions between predictors; and
- e. combination models, including PRS1 and multiple CNV predictors, to test for non-overlapping effects between different categories of CNVs.

These models are compared using Nagelkerke's pseudo- $R^2$  for predictive power, and Akaike's information criterion for model fit. We use likelihood ratio tests to calculate one-sided p-values for the hypothesis that a pair of nested models perform equally well.

1. Schizophrenia Working Group of the Psychiatric Genomics Consortium. Biological insights from 108 schizophrenia-associated genetic loci. *Nature*. 2014;511(7510):421-7.

**Supplementary Table S4.** Original polygenic risk scores calculated as in<sup>1</sup>, definition and association with schizophrenia.

| PRS | Threshold          | OR   | P-value  | Scaled OR | Scaled 95% CI | $\Delta R^2$ |
|-----|--------------------|------|----------|-----------|---------------|--------------|
| S1  | $5 \times 10^{-8}$ | 3.44 | 1.0E-164 | 1.60      | 1.54 - 1.65   | 1.8          |
| S2  | $1 \times 10^{-6}$ | 2.85 | 1.2E-243 | 1.68      | 1.62 - 1.73   | 2.7          |
| S3  | $1 \times 10^{-4}$ | 2.14 | 0.0E+00  | 2.60      | 2.50 - 2.71   | 5.5          |
| S4  | 0.001              | 1.79 | 0.0E+00  | 2.30      | 2.23 - 2.37   | 7.3          |
| S5  | 0.01               | 1.53 | 0.0E+00  | 2.31      | 2.24 - 2.37   | 9.4          |
| S6  | 0.05               | 1.38 | 0.0E+00  | 2.82      | 2.73 - 2.92   | 10.2         |
| S7  | 0.1                | 1.33 | 0.0E+00  | 3.15      | 3.04 - 3.27   | 10.2         |
| S8  | 0.2                | 1.29 | 0.0E+00  | 3.31      | 3.18 - 3.44   | 9.9          |
| S9  | 0.5                | 1.26 | 0.0E+00  | 3.74      | 3.59 - 3.91   | 9.9          |
| S10 | 1.0                | 1.26 | 0.0E+00  | 3.69      | 3.54 - 3.86   | 9.8          |

*Threshold* is the p-value threshold for including SNPs for calculating the PRS.

*OR* is the odds ratio for a +1 increase of the PRS in a multivariable logistic regression model for schizophrenia adjusted for sex, site, CNV quality and five ancestral components; *P-value* is the Likelihood ratio test p-value for the PRS.

*Scaled OR* is the odds ratio for an increase by +1 standard deviation of the PRS in the same multivariable model, and *Scaled 95% CI* is the corresponding 95% confidence interval.

$\Delta R^2$  is the change in Nagelkerke's  $R^2$  when removing the PRS from the multivariable model.

**Supplementary Table S5.** Principal components of the normalized polygenic risk scores as described in the Supplementary Methods and their association with schizophrenia. PRS1 is the first principal component which is used as summary index for polygenic risk of schizophrenia for the logistic regression models presented in Table 2 of the paper.

| Component | Variance | OR   | P-value | Scaled OR | Scaled 95% CI | $\Delta R^2$ |
|-----------|----------|------|---------|-----------|---------------|--------------|
| PRS1      | 69.2     | 1.39 | 0.0E+00 | 2.40      | 2.33 - 2.47   | 11.2         |
| PRS2      | 17.9     | 1.00 | 0.70    | 1.00      | 0.98 - 1.03   | 0.0          |
| PRS3      | 6.1      | 1.00 | 1.00    | 1.00      | 0.98 - 1.02   | 0.0          |
| PRS4      | 2.3      | 1.03 | 0.24    | 1.01      | 0.99 - 1.04   | 0.0          |
| PRS5      | 1.9      | 0.99 | 0.69    | 1.00      | 0.97 - 1.02   | 0.0          |
| PRS6      | 1.3      | 1.02 | 0.47    | 1.01      | 0.99 - 1.03   | 0.0          |
| PRS7      | 0.8      | 0.99 | 0.75    | 1.00      | 0.98 - 1.02   | 0.0          |
| PRS8      | 0.3      | 1.14 | 0.04    | 1.02      | 1.00 - 1.05   | 0.0          |
| PRS9      | 0.2      | 0.88 | 0.16    | 0.98      | 0.96 - 1.01   | 0.0          |
| PRS10     | 0.0      | 0.71 | 0.14    | 0.98      | 0.96 - 1.01   | 0.0          |

*Variance* is the percentage of variance in the normalized scores nS1-nS10 that is explained by the principal component.

*OR* is the odds ratio for a +1 increase of the principal component in a multivariable logistic regression model for schizophrenia adjusted for sex, site, CNV quality and five ancestral components; *P-value* is the corresponding Wald test p-value.

*Scaled OR* is the odds ratio for an increase by +1 standard deviation of the principal component in the same multivariable model, and *Scaled 95% CI* is the corresponding 95% confidence interval.

$\Delta R^2$  is the change in Nagelkerke's  $R^2$  when removing the principal component from the multivariable model.

**Supplementary Table S6.** Normalized polygenic risk scores as described in the Supplementary Methods and their association with schizophrenia.

| Normalized PRS | OR   | P-value  | Scaled OR | Scaled 95% CI | $\Delta R^2$ |
|----------------|------|----------|-----------|---------------|--------------|
| nS1            | 3.44 | 1.0E-164 | 1.36      | 1.33 - 1.39   | 1.8          |
| nS2            | 2.85 | 1.2E-243 | 1.46      | 1.43 - 1.49   | 2.7          |
| nS3            | 2.14 | 0.0E+00  | 1.75      | 1.71 - 1.79   | 5.5          |
| nS4            | 1.79 | 0.0E+00  | 1.94      | 1.89 - 1.98   | 7.3          |
| nS5            | 1.53 | 0.0E+00  | 2.17      | 2.12 - 2.23   | 9.4          |
| nS6            | 1.38 | 0.0E+00  | 2.30      | 2.23 - 2.36   | 10.2         |
| nS7            | 1.33 | 0.0E+00  | 2.29      | 2.23 - 2.35   | 10.2         |
| nS8            | 1.29 | 0.0E+00  | 2.27      | 2.21 - 2.33   | 9.9          |
| nS9            | 1.26 | 0.0E+00  | 2.26      | 2.20 - 2.33   | 9.9          |
| nS10           | 1.26 | 0.0E+00  | 2.26      | 2.20 - 2.32   | 9.8          |

*OR* is the odds ratio for a +1 increase of the normalized PRS in a multivariable logistic regression model for schizophrenia adjusted for sex, site, CNV quality and five ancestral components; *P-value* is the Likelihood ratio test p-value for the normalized PRS.

*Scaled OR* is the odds ratio for an increase by +1 standard deviation of the normalized PRS in the same multivariable model, and *Scaled 95% CI* is the corresponding 95% confidence interval.

$\Delta R^2$  is the change in Nagelkerke's  $R^2$  when removing the normalized PRS from the multivariable model.

**Supplementary Figure S1.** A: Increase in  $R^2$  when adding an original score S1-S10 to the multivariable logistic regression model

B: Percentage of variance explained by principal components PRS1-PRS10 of the normalized scores nS1-nS10

C: Increase in  $R^2$  when adding a principal component PRS1-PRS10 to the multivariable model

D: Odds ratios and 95% confidence intervals for PRS1-10 in a multivariable model

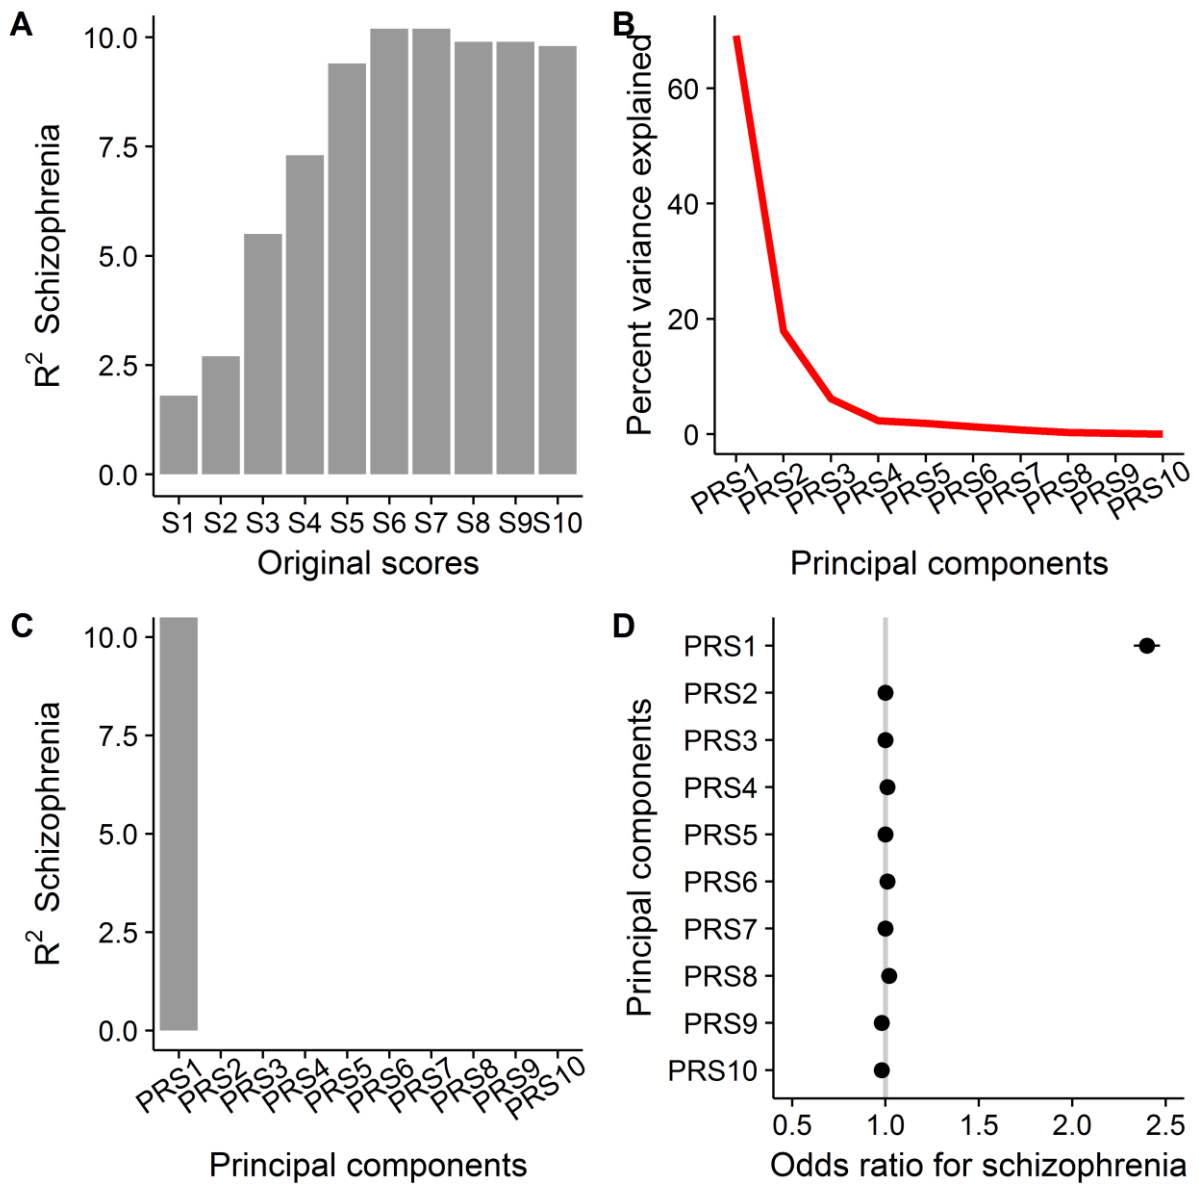

**Supplemental Figure S2.** A: Percent variance of original scores S1-S10 explained by between-site variation (expressed as  $R^2$  from linear regression model)

B: Distribution of original score S6 across sites

C: Distribution of normalized score nS6 across sites

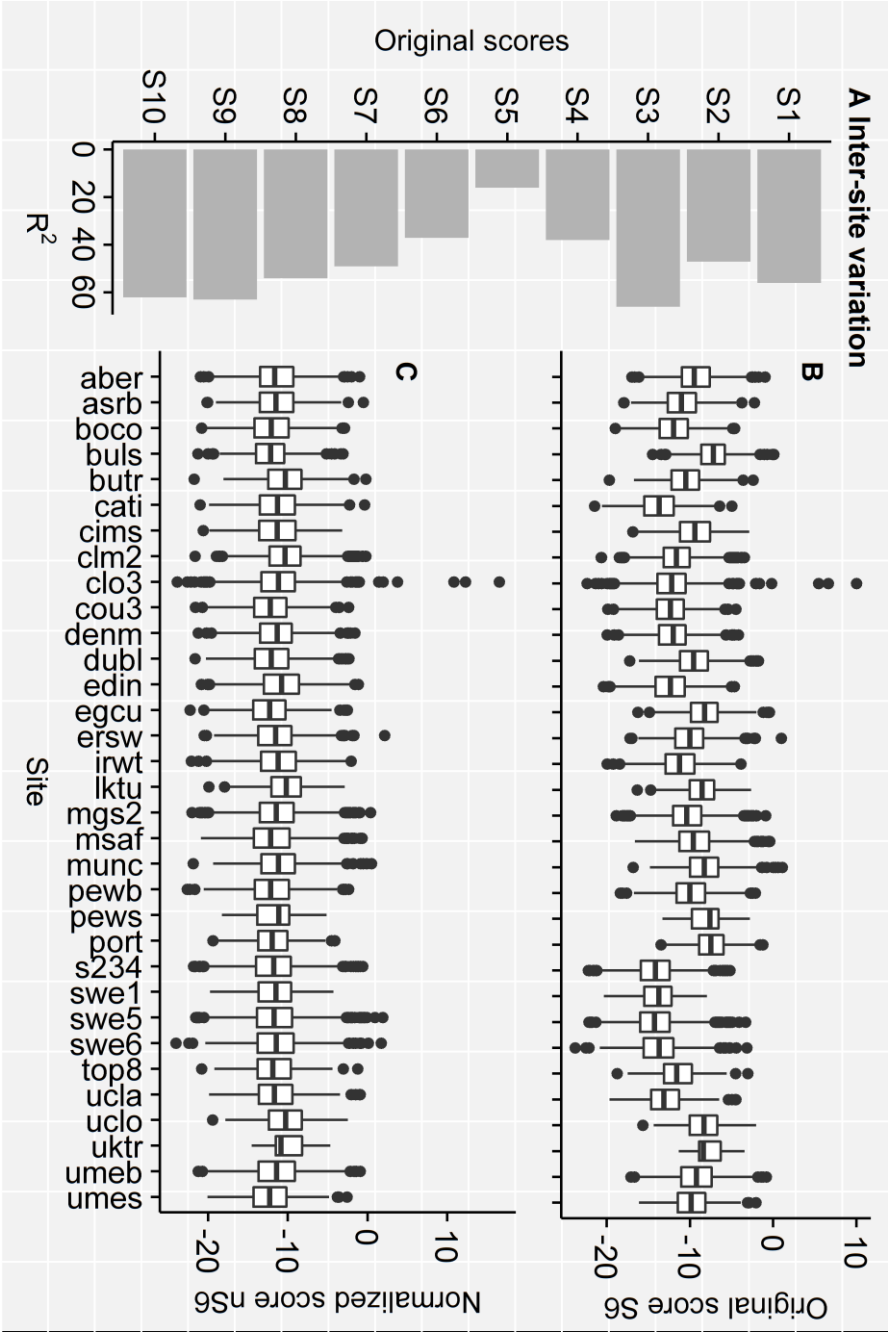

**Supplemental Figure 3.** Scatter plots of mean PRS among cases (vertical axes) against mean PRS among controls (horizontal) axes for all n=28 sites contributing with both cases and controls. A linear regression fit is shown as a blue line, with the pointwise 95% confidence area for the expected value shown in grey.

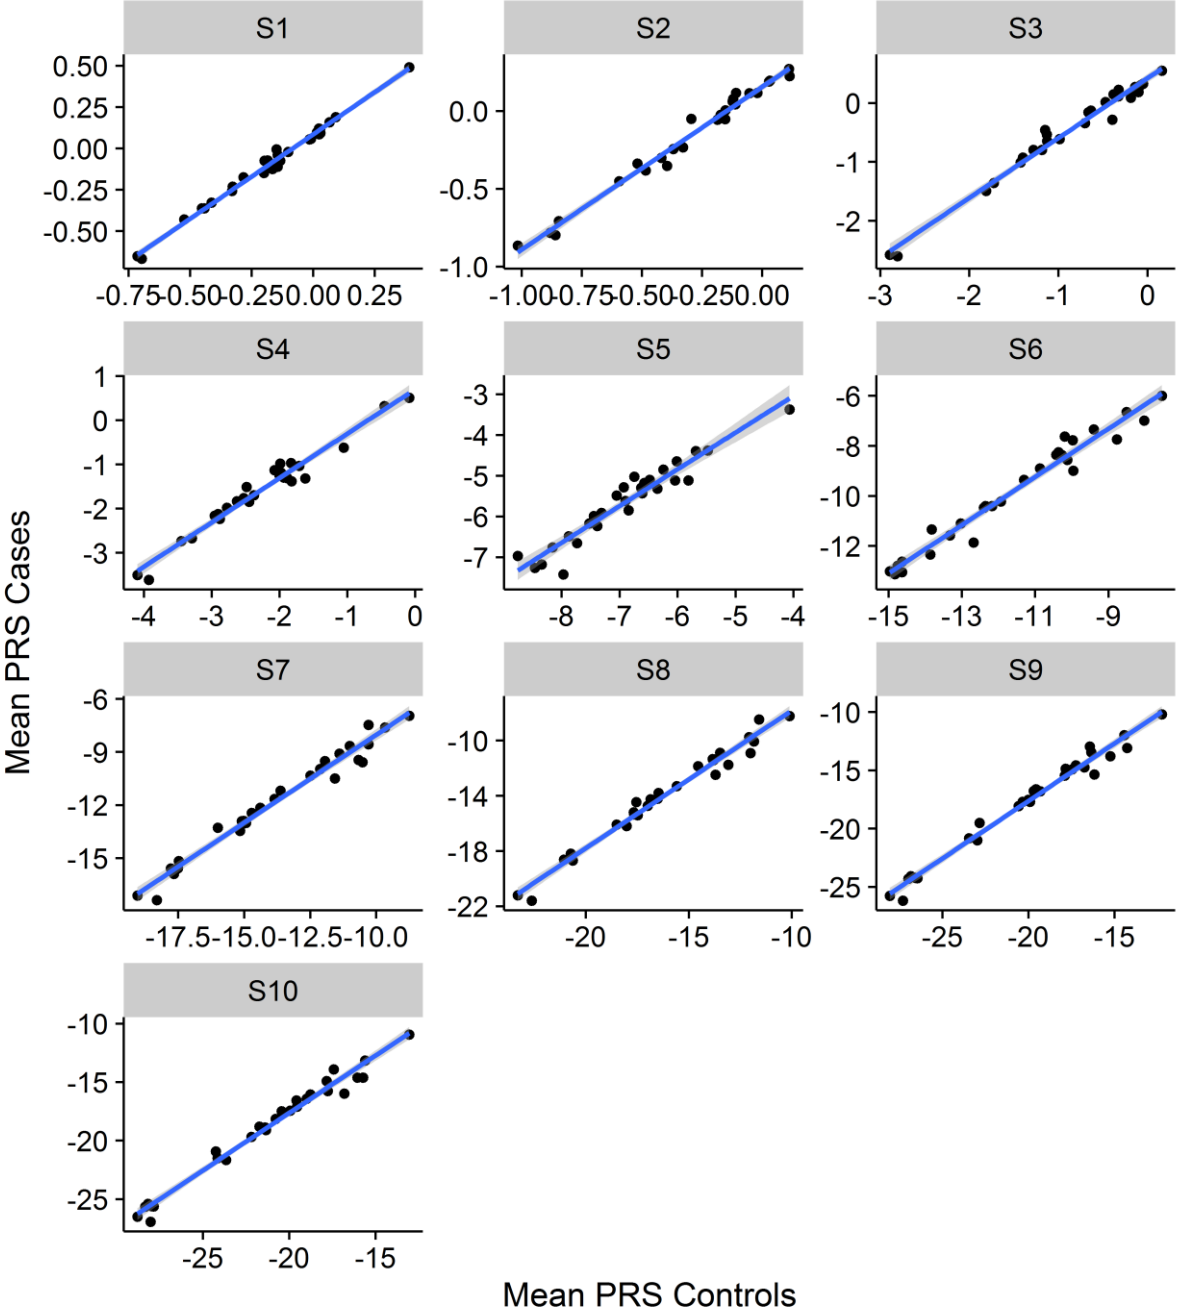

Supplement: appi.ajp.2018.17040467.ds001.pdf [file appi.ajp.2018.17040467.ds001.pdf]
